# Supplementary figures and images for: Potential Additional Effect of Omentectomy on Metabolic Syndrome, Acute-Phase Reactants, and Inflammatory Mediators in Grade III Obese Patients Undergoing Laparoscopic Roux-en-Y Gastric Bypass: A randomized trial
Source: PubMed Central journal article supplement — Diabetes Care. 2010 Jul;33(7):1413–8. doi: 10.2337/dc09-1833 (PMC2890331; doi:10.2337/dc09-1833), 2010-07

## The Consort E-Flowchart Aug. 2005

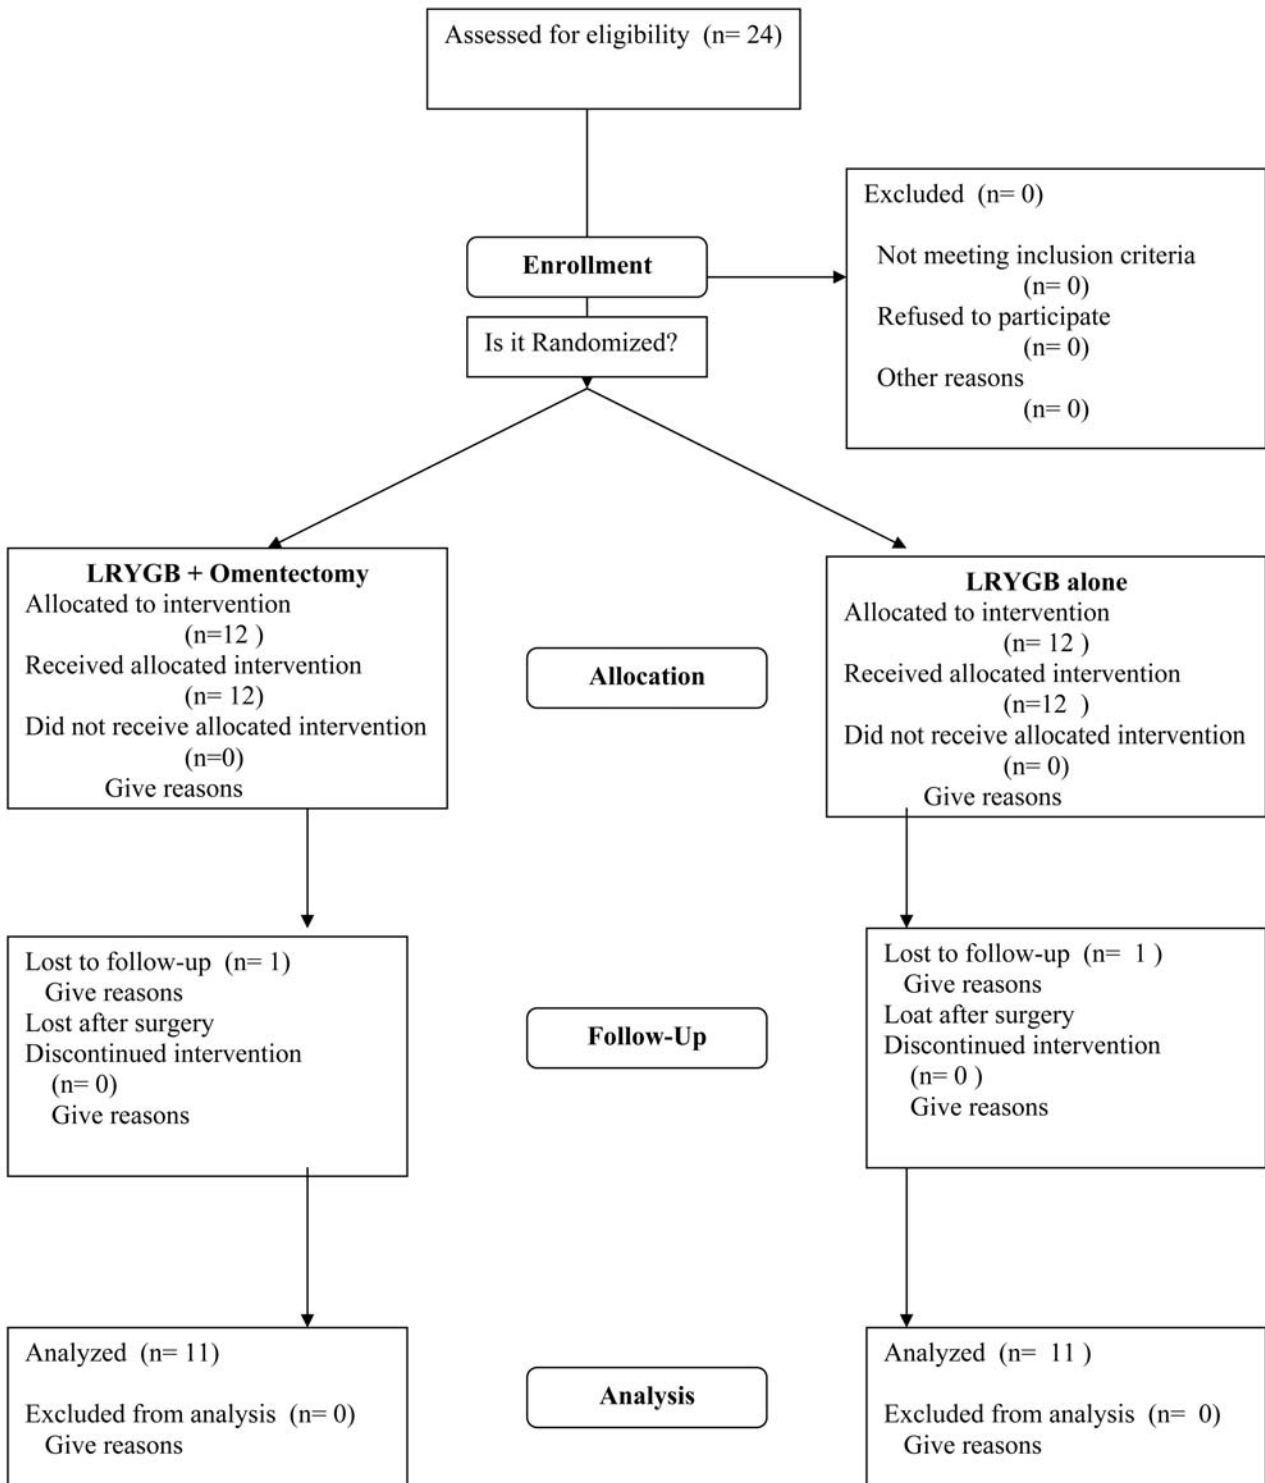

Supplement: supp_dc09-1833_onlineappendix.pdf [file supp_dc09-1833_onlineappendix.pdf]
